# Supplementary material for: Influence of Sb-substitution on ionic transport in lanthanum orthoniobates
Source: Royal Society of Chemistry journal article supplement (doi:10.1039/c6ta03403a), 2016-01-01

SI Fig.1. Total, bulk and specific grain boundary conductivities of LCNSO samples. 10 mol. % Sb in a) H<sub>2</sub>O-wet and b) dry conditions and 30 mol. % Sb in c) H<sub>2</sub>O-wet and d) dry conditions. The lines included in the figures are guides for the eye, only, and do not represent the actual linear fitting to Arrhenius relation.

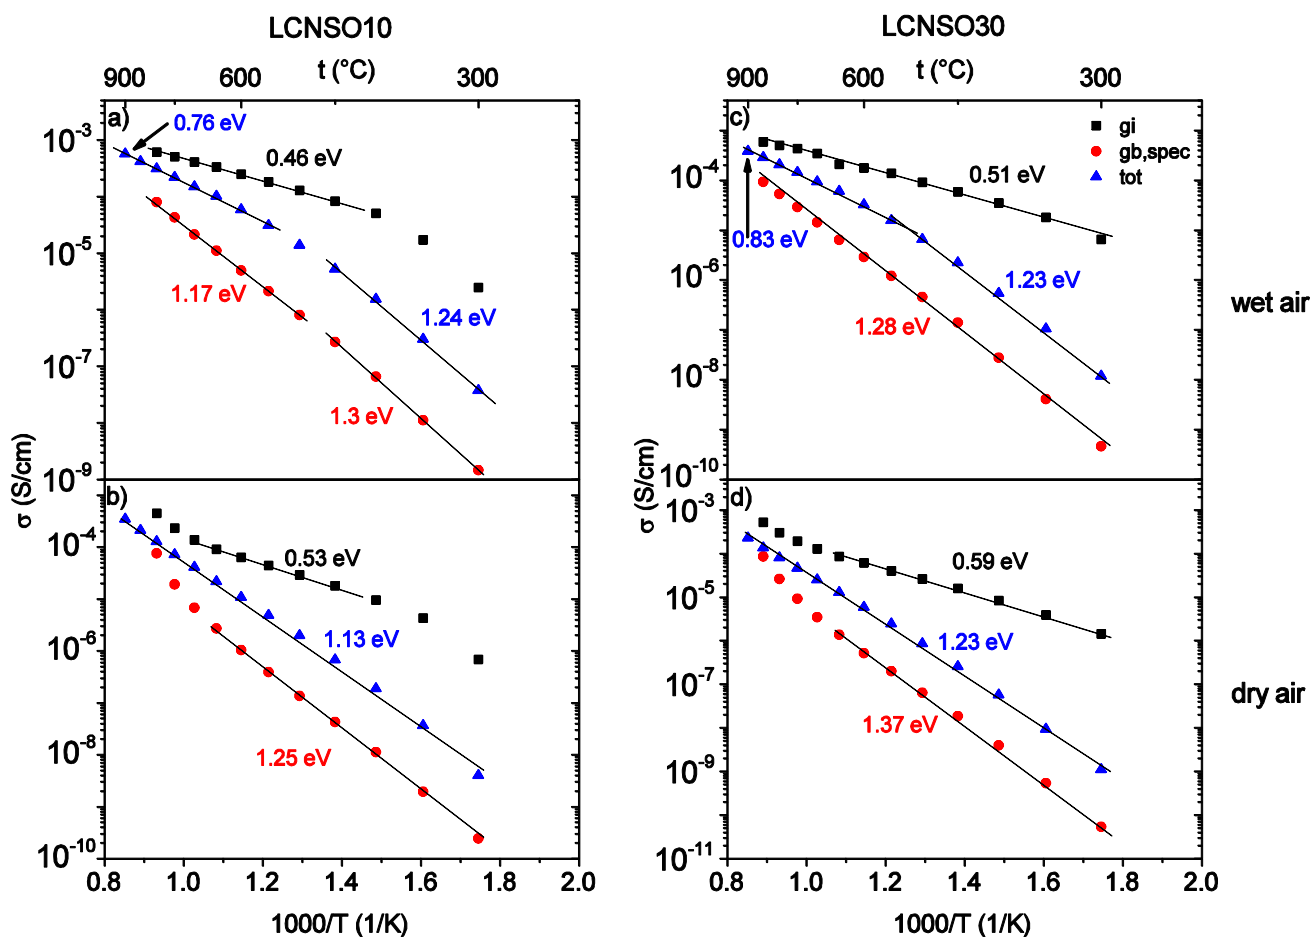

Supplement: c6ta03403a1.pdf [file c6ta03403a1.pdf]
