# Supplementary material for: Influence of Sb-substitution on ionic transport in lanthanum orthoniobates
Source: Royal Society of Chemistry journal article supplement (doi:10.1039/c6ta03403a), 2016-01-01

SI Fig.2. Showing the overall 2<sup>nd</sup> ion signal of the  $^{18}\text{O}^-$ ,  $^{16}\text{O}^-$ ,  $^{18}\text{O}^-+^{16}\text{O}^-$  and selected cation species  $\text{LaO}_2^-$ ,  $\text{NbO}_3^-$ , and  $\text{SbO}^-$  species; the data is obtained by summing the signal in the depth region highlighted in figure 1a and then normalized to the total counts

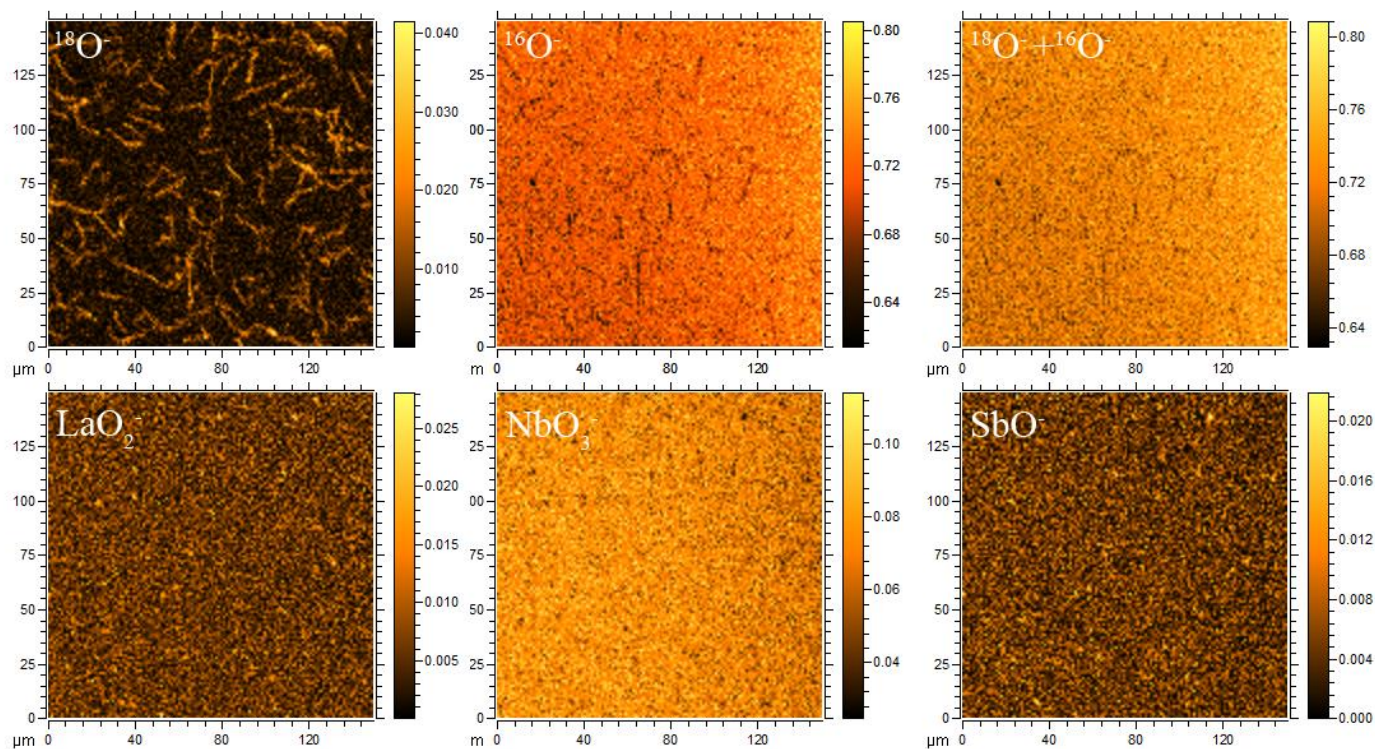

Supplement: c6ta03403a2.pdf [file c6ta03403a2.pdf]
